# Supplementary material for: Retromer stops beta-arrestin 1–mediated signaling from internalized cannabinoid 2 receptors
Source: PubMed Central journal article supplement — Mol Biol Cell. 2017 Nov 15;28(24):3554–61. doi: 10.1091/mbc.E17-03-0198 (PMC5683765; doi:10.1091/mbc.e17-03-0198), 2017-11-15
Supplement: supp_E17-03-0198v1_CombinedSupMats.pdf [file supp_E17-03-0198v1_CombinedSupMats.pdf]

# Supplemental Materials

*Molecular Biology of the Cell*

Nogueras-Ortiz et al.

# A

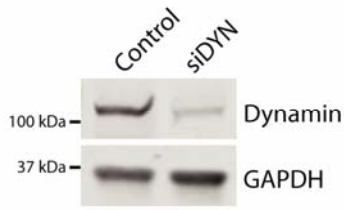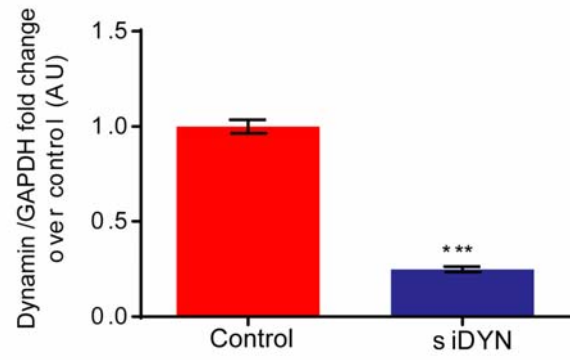

# B

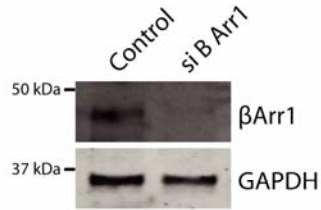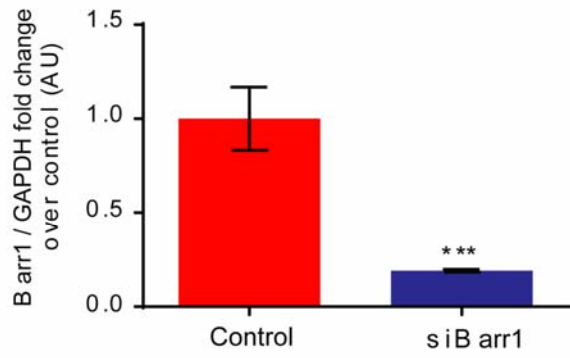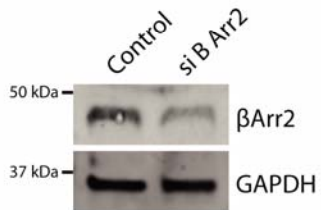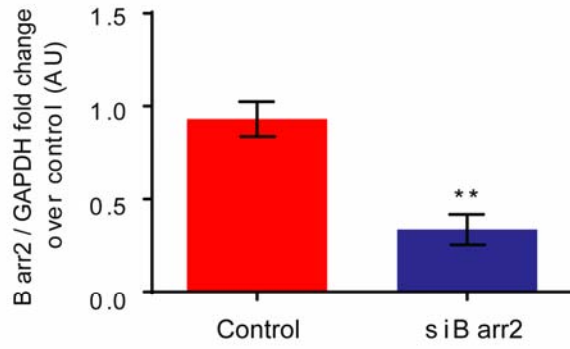

# C

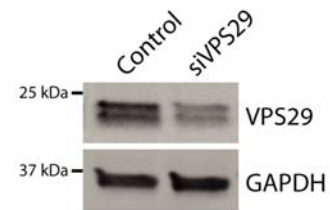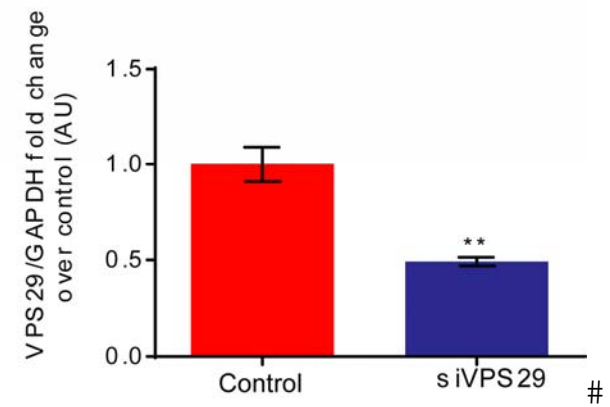

### **Supplemental figure 1**

The effectiveness of siRNA knockdown was confirmed by western-blot. (A) Dynamin expression levels was investigated two to three days after siRNA transfection utilizing Dynamin 2 specific antibody. Significant reduction in protein expression was observed in multiple experiments (B) siRNA knockdown of beta-arrestin1 and beta arrestin 2 was confirmed with specific antibodies. (C) Reduction of VPS29 expression levels by siRNA was analyzed by western-blot. Quantifications were performed as fold change over control (GAPDH), n>5.

## HEK-CB1R

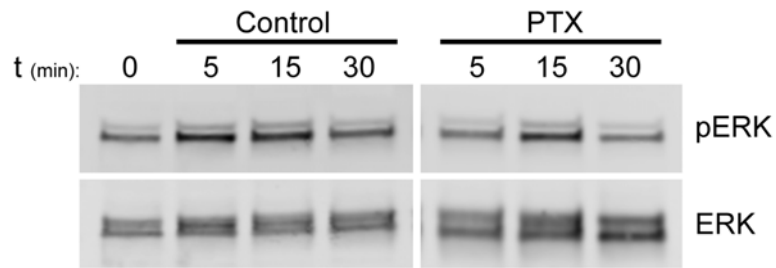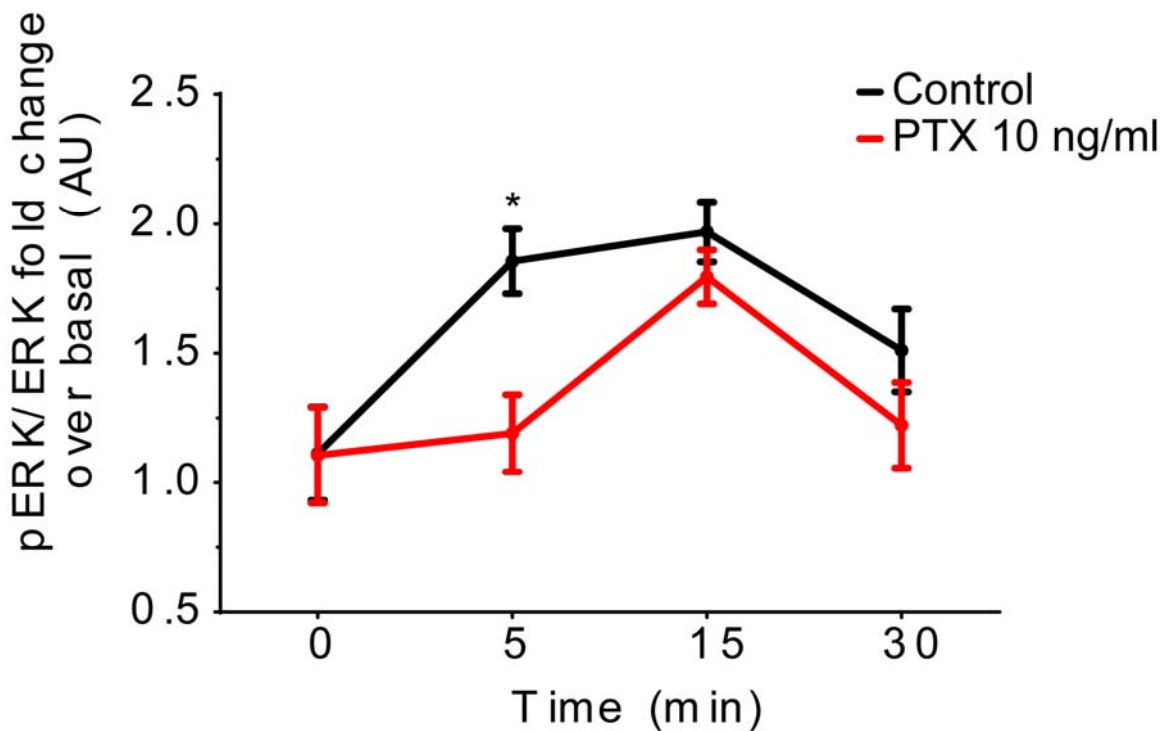

### Supplemental figure 2

(A) Time course of ERK1/2 phosphorylation by 2-AG in HEK cells stably expressing CB<sub>1</sub>R was analyzed by western-blot. Cell lysates were analyzed with phospho-ERK (top) and total ERK (bottom panel). Cells were preincubated with 10ng/ml PTX overnight, before 2-AG treatments. (B) Time course quantification of independent experiments (n=5)

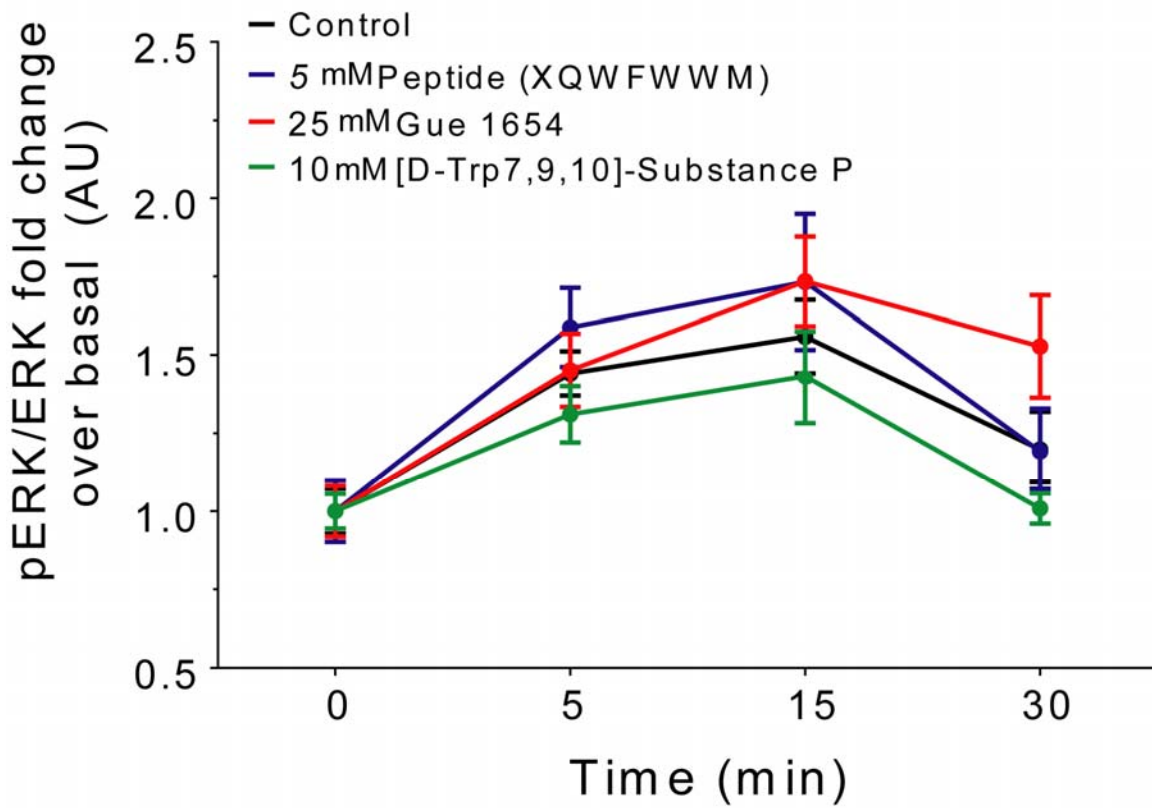

### Supplemental figure 3

Time course showing ERK1/2 phosphorylation in HEK293 cells stably expressing CB<sub>2</sub>R and preincubated with G protein inhibitors as describe in methods in the presence of 10 $\mu$ M 2-AG. Cell lysates were analyzed by western blots against phospho-ERK1/2 and total ERK1/2 and quantified (n>6). No statistical significance was observed between treatments and control samples.
